# Supplementary material
Source: HighWire-hosted journal article supplement (https://www.jrheum.org/highwire/filestream/38710/field_highwire_adjunct_files/0/200211DataSuppl.pdf)
Supplement: 200211DataSuppl.pdf [file 200211DataSuppl.pdf]

**Supplementary Figure 1. Schematic of case identification of all infection events.**

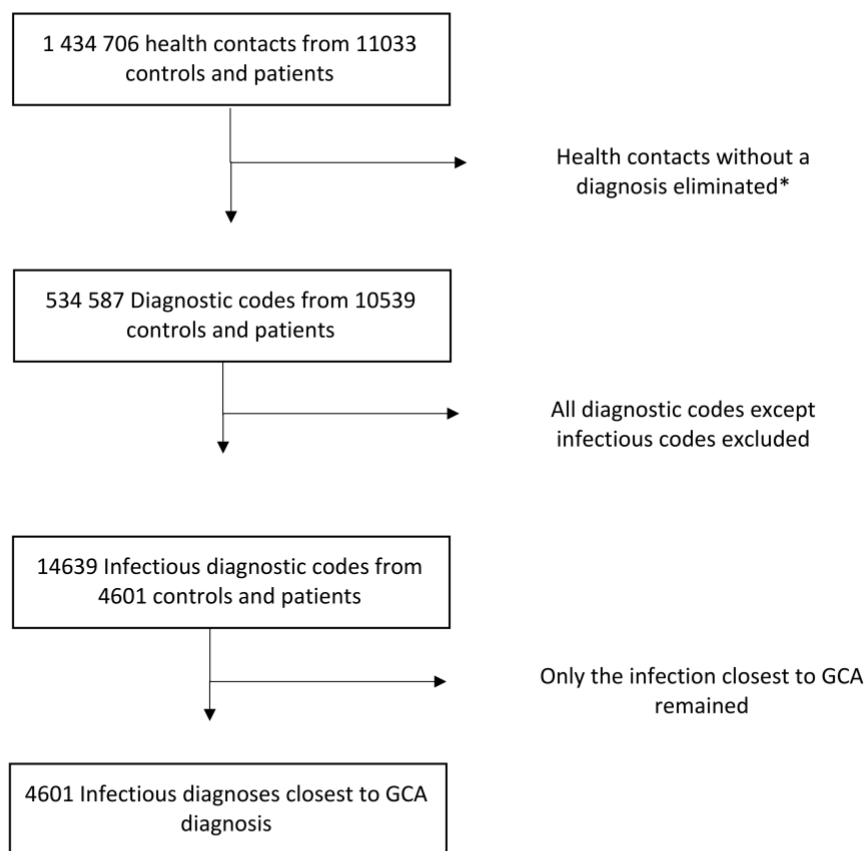

\* The health care contacts without a diagnosis are most likely visits to nurses, occupational therapists, psychologists, physiotherapists, social workers and other contacts than physician visits (renewal of prescriptions, blood tests, radiographical examinations, telehealth contacts etc.)

**Supplementary Table 1. Odds ratio for subsequent GCA diagnosis from analyses restricted to infections occurring 1 to 6 months prior to index date. The last month prior to index date is excluded.**

| <b>Category</b>                                 | <b>Odds ratio (CI)</b> | <b>Controls</b> | <b>Cases</b> |
|-------------------------------------------------|------------------------|-----------------|--------------|
| <b>All-site infections</b>                      | 2.11 (1.68-2.64)       | 651             | 118          |
| <b>Acute upper respiratory tract infections</b> | 3.18 (2.15-4.69)       | 155             | 41           |
| <b>Influenza and pneumonia</b>                  | 2.47 (1.59-3.84)       | 140             | 30           |
| <b>Skin infections</b>                          | 0.92 (0.45-1.89)       | 97              | 9            |
| <b>Urinary tract infections</b>                 | 1.19 (0.66-2.15)       | 120             | 14           |
| <b>Unspecified infections</b>                   | 9 (2.72-29.81)         | 10              | 6            |

---

Categories with  $\leq 10$  events in cases and controls are not shown
